# Supplementary material for: Nucleophilic fluoroalkylation/cyclization route to fluorinated phthalides
Source: publisher site journal article supplement (doi:10.3762/bjoc.14.12), 2018-01-19
Supplement: Additional file 1 [file 1860-5397-14-12-S1.pdf]

**Supporting Information**  
**for**  
**Nucleophilic fluoroalkylation/cyclization route to**  
**fluorinated phthalides**

Masanori Inaba<sup>1</sup>, Tatsuya Sakai<sup>1</sup>, Shun Shinada<sup>1</sup>, Tsuyuka Sugiishi<sup>1</sup>, Yuta Nishina<sup>2</sup>,  
Norio Shibata<sup>3</sup>, and Hideki Amii\*<sup>1</sup>

Address: <sup>1</sup>Division of Molecular Science, Graduate School of Science and  
Technology, Gunma University, 1-5-1 Tenjin-cho, Kiryu, Gunma, 376-8515, Japan,  
<sup>2</sup>Research Core for Interdisciplinary Sciences, Okayama University, 3-1-1  
Tsushimanaka, Kita-ku, Okayama 700-8530, Japan and <sup>3</sup>Department of  
Nanopharmaceutical Sciences, Department of Life Science and Applied Chemistry,  
Nagoya Institute of Technology Gokiso, Showa-ku, Nagoya 466-8555, Japan

Email: Hideki Amii - amii@gunma-u.ac.jp

\* Corresponding author

**General methods, synthetic procedures, <sup>1</sup>H and <sup>19</sup>F NMR spectra**  
**for known compound 1a and full characterization**  
**of all new compounds**

## Contents

|                                   |    |
|-----------------------------------|----|
| 1. General remarks                | S2 |
| 2. Experimental procedures        | S2 |
| 3. References                     | S5 |
| 4. Spectral characterization data | S6 |

### 1. General remarks

All reactions were carried out under a nitrogen atmosphere in flame-dried glassware. Syringes which were used to transfer anhydrous solvents or reagents were purged with argon prior to use. Starting materials, reagents, and dry solvent were purchased from commercial suppliers and used without further purification.  $^1\text{H}$  NMR spectra were recorded using  $\text{Me}_4\text{Si}$  as an internal standard ( $\delta$  0 ppm).  $^{19}\text{F}$  NMR spectra were recorded in  $\text{CDCl}_3$  on JEOL JNM-ECS300 (300 MHz), JEOL JNM-ECS400 (400 MHz) and JEOL JNM-ECA600 (600 MHz) spectrometers using  $\text{CFCl}_3$  as an internal standard ( $\delta$  0 ppm). Splitting patterns were reported as s, singlet; d, doublet; t, triplet; q, quartet; m, multiplet; br, broad.

### 2. Experimental procedures

3-(Trifluoromethyl)phthalide (**1a**) [CAS Registry No. 76284-62-3]<sup>1</sup>

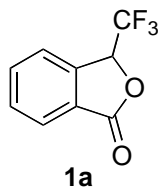

**Conditions A:** To a mixture of 2-cyanobenzaldehyde (65.6 mg, 0.50 mmol), KF (20.9 mg, 0.36 mmol), and DMF (2.5 mL) was added trifluoromethyl(trimethyl)silane (85.3 mg, 0.60 mmol) at room temperature. The reaction mixture was stirred at room temperature in an atmosphere of nitrogen for 1 h and quenched with 1 M HCl (2.5 mL). The reaction mixture was stirred at 100 °C for 6 h. The aqueous layer was extracted with ethyl acetate. Then, the combined organic phase was washed with water, dried over anhydrous  $\text{Na}_2\text{SO}_4$ . Purification

by column chromatography on silica gel (hexane/ethyl acetate = 5/1) gave 95.9 mg (0.474 mmol, 95%) of 3-(trifluoromethyl)phthalide (**1a**) as a colorless oil; Mp 40.2-41.6 °C; IR (neat) 1780  $\text{cm}^{-1}$ ;  $^1\text{H}$  NMR (400 MHz,  $\text{CDCl}_3$ )  $\delta$  5.68 (1H, q,  $J = 5.7$  Hz), 7.66-7.72 (2H, m), 7.78-7.82 (1H, m), 8.00 (1H, d,  $J = 7.6$  Hz);  $^{19}\text{F}$  NMR (376 MHz,  $\text{CDCl}_3$ )  $\delta$  -77.0 (3F, s); EI-MS  $m/z$  (%) 202 ( $\text{M}^+$ , 1), 155 (6), 133 (100), 105 (19), 77 (14).

### 3-(Pentafluoroethyl)phthalide (**1b**)

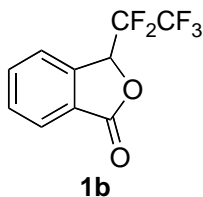

The title compound was prepared according to the procedure A using 2-cyanobenzaldehyde (65.6 mg, 0.50 mmol), KF (20.9 mg, 0.36 mmol), and DMF (2.5 mL) was added pentafluoroethyl(trimethyl)silane (115.3 mg, 0.60 mmol) and purified by column chromatography (hexane/ethyl acetate = 5/1) to give colorless solid (97.0 mg, 0.385 mmol, 77%); Mp 60.8-62.9 °C; IR (neat) 1775  $\text{cm}^{-1}$ ;  $^1\text{H}$  NMR (400 MHz,  $\text{CDCl}_3$ )  $\delta$  5.76 (1H, dd,  $J = 2.4, 17.6$  Hz), 7.65-7.73 (2H, m), 7.79-7.83 (1H, m), 8.00 (1H, d,  $J = 7.6$  Hz);  $^{13}\text{C}$  NMR (150 MHz,  $\text{CDCl}_3$ )  $\delta$  74.9 (dd,  $J = 25.8, 33.0$  Hz), 111.5 (ddq,  $J = 261, 253, 37.8$  Hz), 118.3 (qt,  $J = 286, 34.5$  Hz), 124.0 (d,  $J = 2.9$  Hz), 126.0, 126.4, 131.2, 134.9, 140.5, 168.1;  $^{19}\text{F}$  NMR (376 MHz,  $\text{CDCl}_3$ )  $\delta$  -130.6 (1F, dd,  $J = 17.6, 282$  Hz), -122.4 (1F, d,  $J = 282$  Hz), -82.8--81.9 (3F, m); EI-MS  $m/z$  (%) 252 ( $\text{M}^+$ , 1), 205 (8), 133 (100), 105 (91), 77 (96). Anal. Calcd for  $\text{C}_{10}\text{H}_5\text{O}_2\text{F}_5$ : C, 47.64; H, 2.00. Found: C, 47.50; H, 2.17.

### 3-(Pentafluorophenyl)phthalide (**1d**)

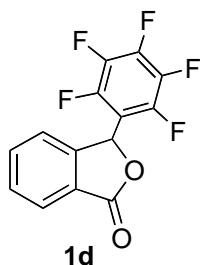

The title compound was prepared according to the procedure A using 2-cyanobenzaldehyde (65.6 mg, 0.50 mmol), KF (20.9 mg, 0.36 mmol), and DMF (2.5 mL) was added pentafluorophenyl(trimethyl)silane (144.2 mg, 0.60 mmol) and purified by column chromatography (hexane/ethyl acetate = 5/1) to give colorless solid (129.6 mg, 0.432 mmol, 86%); Mp 110.0-112.6 °C; IR (neat) 1760  $\text{cm}^{-1}$ ;  $^1\text{H}$  NMR (400 MHz,  $\text{CDCl}_3$ )  $\delta$  6.74 (1H, s), 7.34 (1H, d,  $J = 8.4$  Hz), 7.61 (1H, t,  $J = 7.6$  Hz), 7.70-7.74 (1H, m), 8.00 (1H, d,  $J = 7.6$  Hz);  $^{13}\text{C}$  NMR (75 MHz,  $\text{CDCl}_3$ )  $\delta$  71.9, 110.3 (t,  $J = 12.0$  Hz), 122.0, 125.6, 126.1, 130.1, 134.7, 137.8 (d,  $J = 245$  Hz), 145.0 (d,  $J = 250$  Hz), 145.5 (d,  $J = 250$  Hz),

146.7, 169.3;  $^{19}\text{F}$  NMR (376 MHz,  $\text{CDCl}_3$ )  $\delta$  -160.6--160.5 (2F, m), -151.0 (1F, t,  $J = 23.0$  Hz), -142.8 (2F, dd,  $J = 6.0, 23.0$  Hz); EI-MS  $m/z$  (%) 300 ( $\text{M}^+$ , 1), 255 (9), 237 (19), 133 (11), 105 (100), 77 (23). Anal. Calcd for  $\text{C}_{14}\text{H}_5\text{O}_2\text{F}_5$ : C, 56.02; H, 1.68. Found: C, 55.95; H, 1.77.

### 3-(Heptafluoropropyl)phthalide (**1c**)

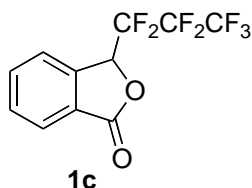

**Conditions B:** To a mixture of 2-cyanobenzaldehyde (65.6 mg, 0.50 mmol), triethylamine (50.5 mg, 0.50 mmol), and DMF (2.5 mL) was added heptafluoropropyl(trimethyl)silane (145.3 mg, 0.60 mmol) at room temperature. The reaction mixture was stirred at room temperature in an atmosphere of nitrogen for 1 h and quenched with 4 M HCl (2.5 mL). The reaction mixture was stirred at 100 °C for 1 h. The aqueous layer was extracted with ethyl acetate. Then, the combined organic phase was washed with water, dried over anhydrous  $\text{Na}_2\text{SO}_4$ . Purification by column chromatography on silica gel (hexane/ethyl acetate = 5/1) gave 90.5 mg (0.300 mmol, 60%) of 3-(heptafluoropropyl)phthalide (**1c**) as colorless solid; Mp 45.0-46.2 °C; IR (neat) 1782  $\text{cm}^{-1}$ ;  $^1\text{H}$  NMR (400 MHz,  $\text{CDCl}_3$ )  $\delta$  5.83 (1H, d,  $J = 18.4$  Hz), 7.68-7.73 (2H, m), 7.78-7.82 (1H, m), 8.00 (1H, d,  $J = 7.6$  Hz);  $^{13}\text{C}$  NMR (150 MHz,  $\text{CDCl}_3$ )  $\delta$  75.0 (dd,  $J = 26.0, 34.0$  Hz), 108.8 (tq,  $J = 265, 36.7$  Hz), 113.3 (ddt,  $J = 252, 264, 30.7$  Hz), 117.5 (qt,  $J = 286, 33.0$  Hz), 124.2, 126.1, 126.3, 131.2, 134.9, 140.5, 168.2;  $^{19}\text{F}$  NMR (376 MHz,  $\text{CDCl}_3$ )  $\delta$  -127.2 (1F, d,  $J = 298$  Hz), -126.6 (1F, d,  $J = 291$  Hz), -125.7 (1F, d,  $J = 291$  Hz), -120.2 (1F, d,  $J = 298$  Hz), -80.9 (3F, t,  $J = 15.4$  Hz); EI-MS  $m/z$  (%) 302 ( $\text{M}^+$ , 1), 169 (7), 133 (100), 105 (63), 77 (78). Anal. Calcd for  $\text{C}_{14}\text{H}_5\text{O}_2\text{F}_5$ : C, C 43.73; H, 1.67. Found: C, 43.29; H, 1.81.

### (-)-3-(Trifluoromethyl)phthalide ((-)-**1a**)

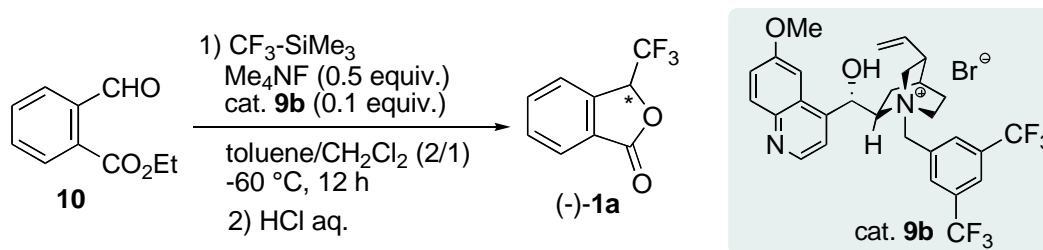

To a mixture of ethyl 2-formylbenzoate (**10**; 89.1 mg, 0.50 mmol), **9b** (15.8 mg, 0.025 mmol), <sup>2</sup> tetramethylammonium fluoride (9.3 mg, 0.10 mmol), toluene (4.0 mL), and dichloromethane (2.0 mL) was added trifluoromethyl(trimethyl)silane (141.3 mg, 1.0 mmol) at -60 °C. The reaction mixture was stirred at room temperature in an atmosphere of

nitrogen at  $-60\text{ }^{\circ}\text{C}$  for 24 h and quenched with sat.  $\text{NH}_4\text{Cl}$  aq (5 mL). The aqueous layer was extracted with ethyl acetate. Then, the combined organic phase was washed with water, dried over anhydrous  $\text{Na}_2\text{SO}_4$ . After removal of the solvent under reduced pressure, to the residue was added DMF (2.5 mL) and 1 M HCl (2.5 mL). The reaction mixture was stirred at  $100\text{ }^{\circ}\text{C}$  for 6 h. The aqueous layer was extracted with ethyl acetate. Then, the combined organic phase was washed with water, dried over anhydrous  $\text{Na}_2\text{SO}_4$ . Purification by column chromatography on silica gel (hexane/ethyl acetate = 5:1) gave 78.8 mg (0.39 mmol, 78% yield, 27% ee) of 3-(trifluoromethyl)phthalide (**1a**) as a colorless oil;  $^1\text{H}$  NMR (400 MHz,  $\text{CDCl}_3$ )  $\delta$  5.68 (1H, q,  $J = 5.7$  Hz), 7.66-7.72 (2H, m), 7.78-7.82 (1H, m), 8.00 (1H, d,  $J = 7.6$  Hz); HPLC condition: Chiralcel OD-H, hexane/2-propanol = 9/1, flow = 1.0 mL/min, wavelength = 224 nm, temp. =  $30\text{ }^{\circ}\text{C}$ ,  $t_{\text{R}} = 8.5$  min for (-)-**1a** and  $t_{\text{R}} = 12.0$  min for (+)-**1a**.<sup>1</sup>

### 3. References

- 1) R. Pedrosa, S. Sayalero, M. Vicente, *Tetrahedron* **2006**, *62*, 10400.
- 2) S. Mizuta, N. Shibata, S. Akiti, H. Fujimoto, S. Nakamura, T. Toru, *Org. Lett.* **2007**, *9*, 3707.

## 4. Spectral Characterization Data

### <sup>1</sup>H NMR Spectrum of 3-(trifluoromethyl)phthalide (1a)

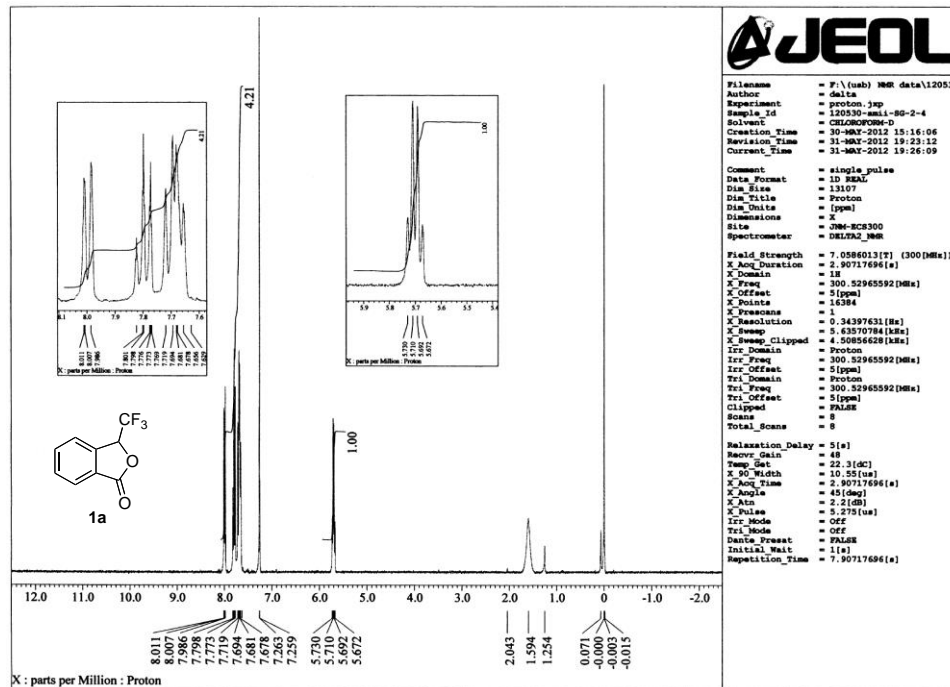

### <sup>19</sup>F NMR Spectrum of 3-(trifluoromethyl)phthalide (1a)

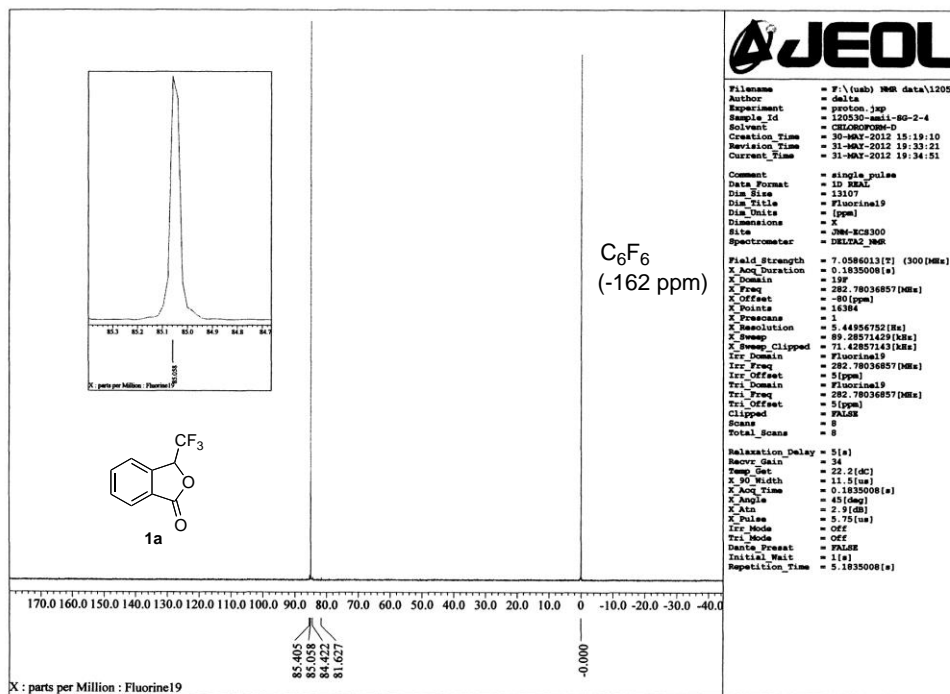

<sup>1</sup>H NMR Spectrum of 3-(pentafluoroethyl)phthalide (**1b**)

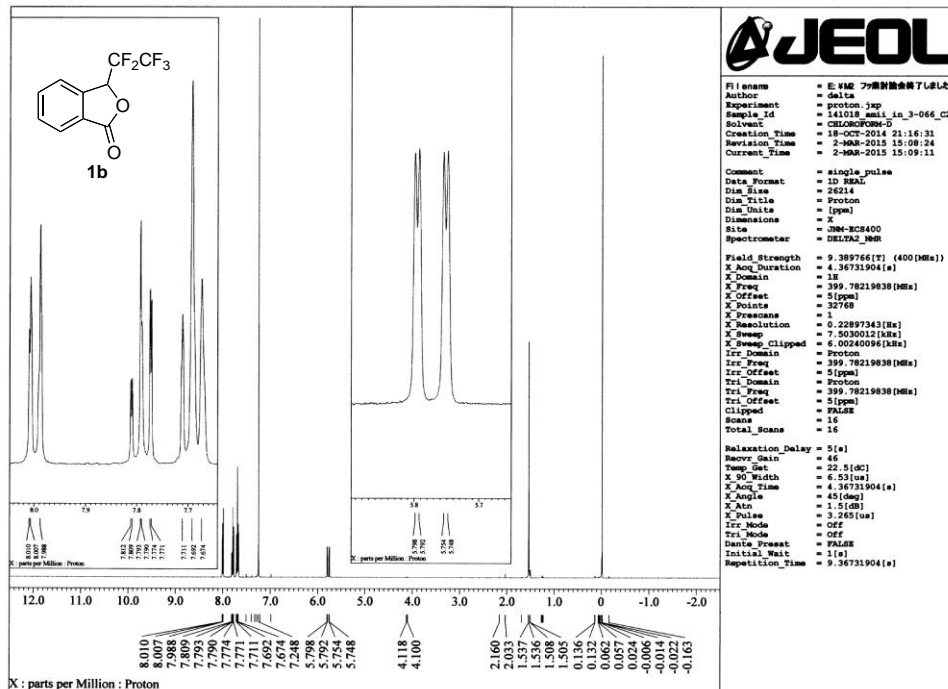

<sup>13</sup>C NMR Spectrum of 3-(pentafluoroethyl)phthalide (**1b**)

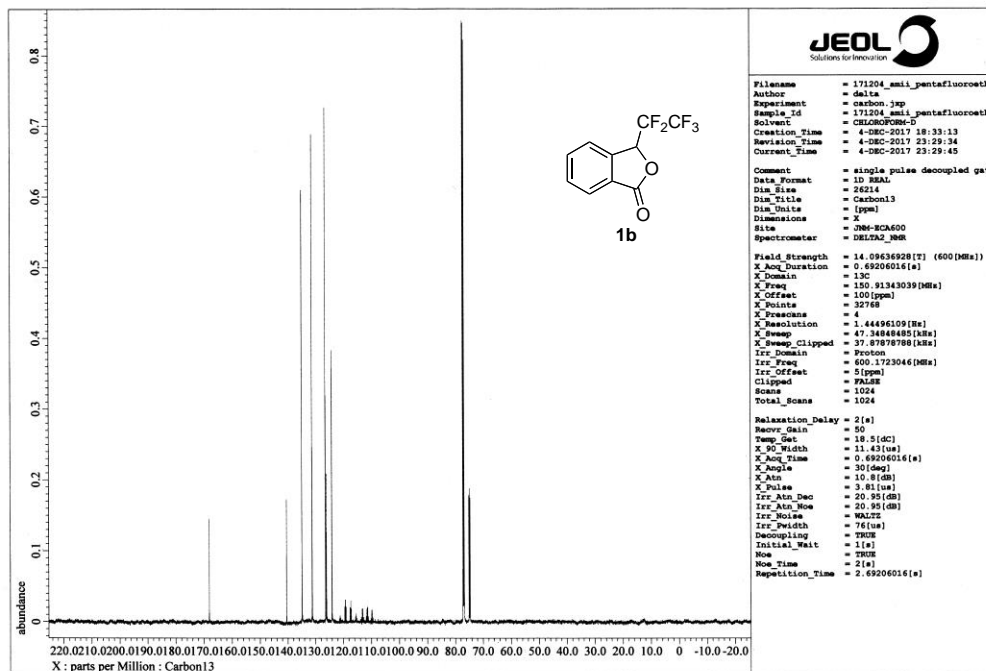

<sup>19</sup>F NMR Spectrum of 3-(pentafluoroethyl)phthalide (**1b**)

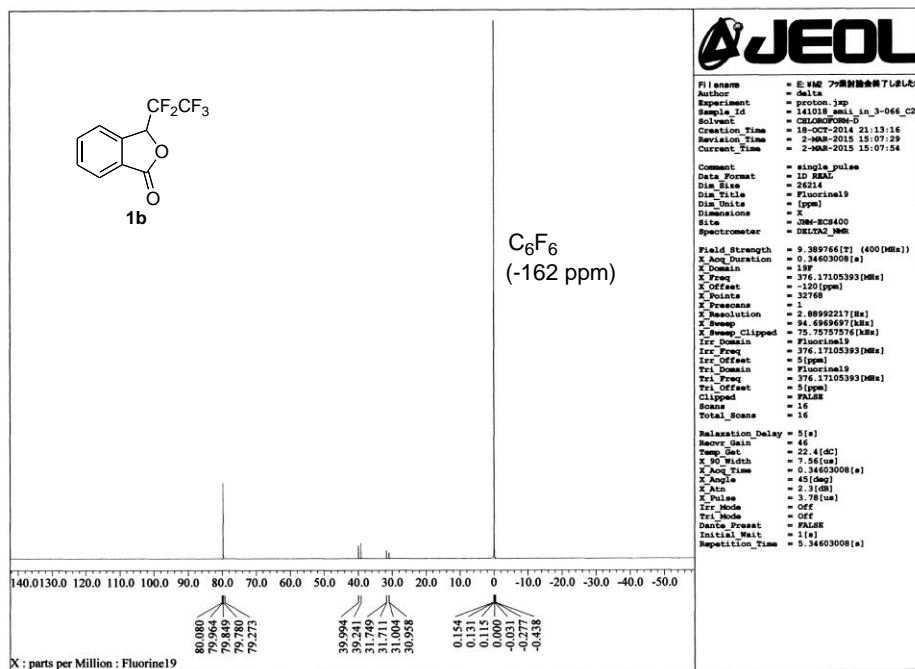

<sup>1</sup>H NMR Spectrum of 3-(heptafluoropropyl)phthalide (**1c**)

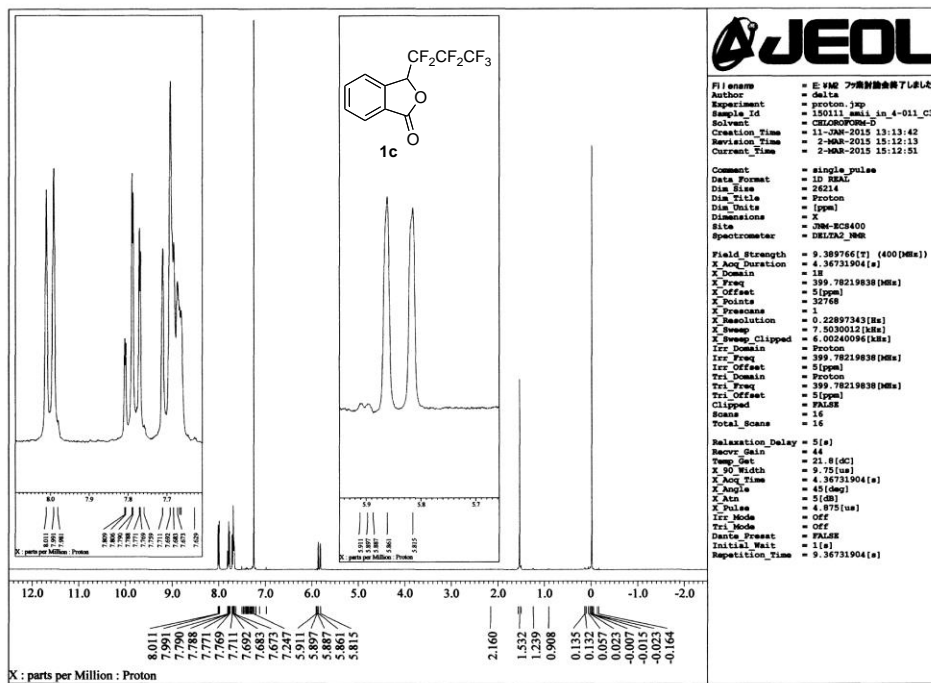



<sup>13</sup>C NMR Spectrum of 3-(heptafluoropropyl)phthalide (1c)

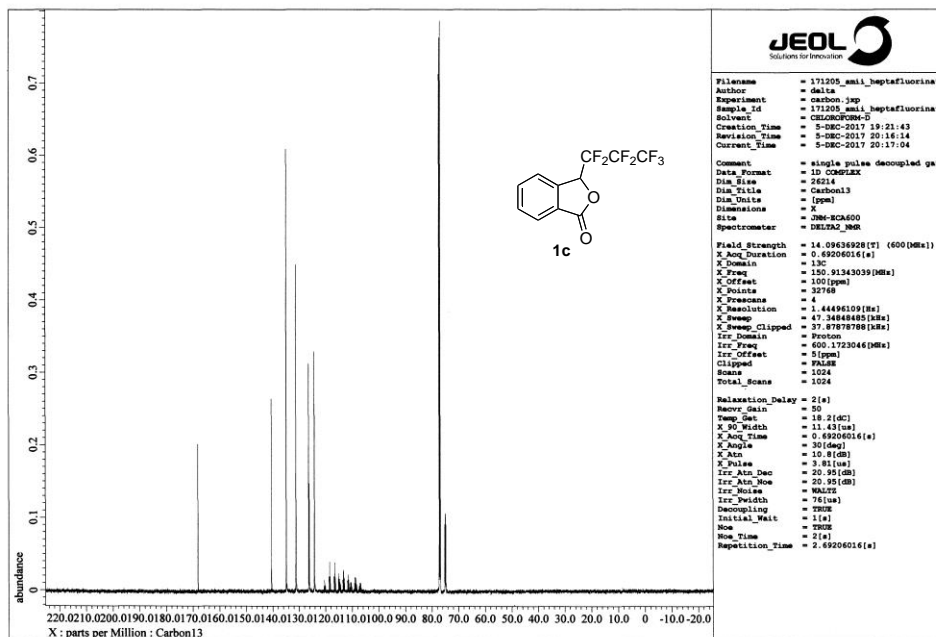

<sup>19</sup>F NMR Spectrum of 3-(heptafluoropropyl)phthalide (1c)

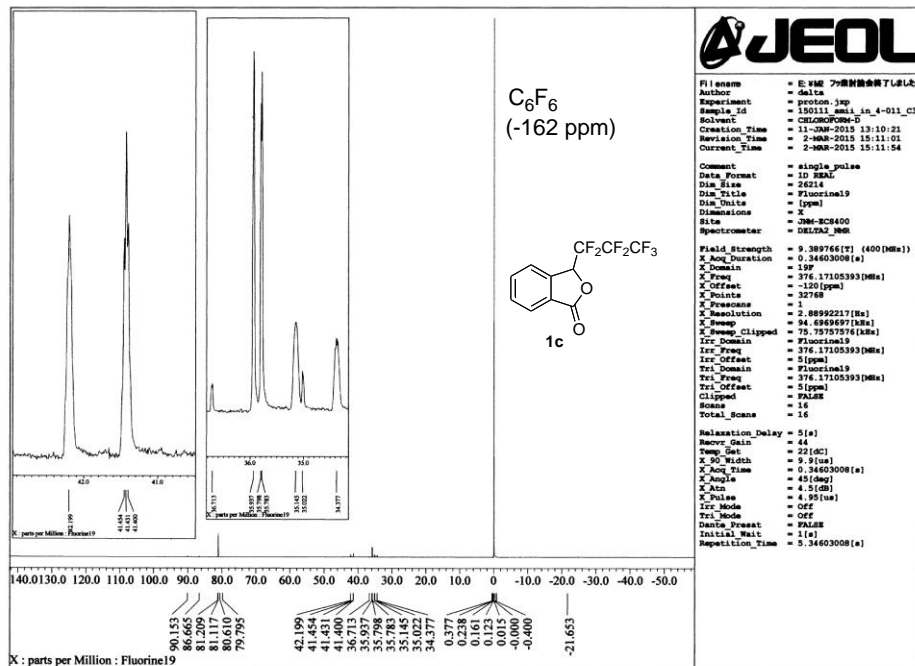

<sup>1</sup>H NMR Spectrum of 3-(pentafluorophenyl)phthalide (**1d**)

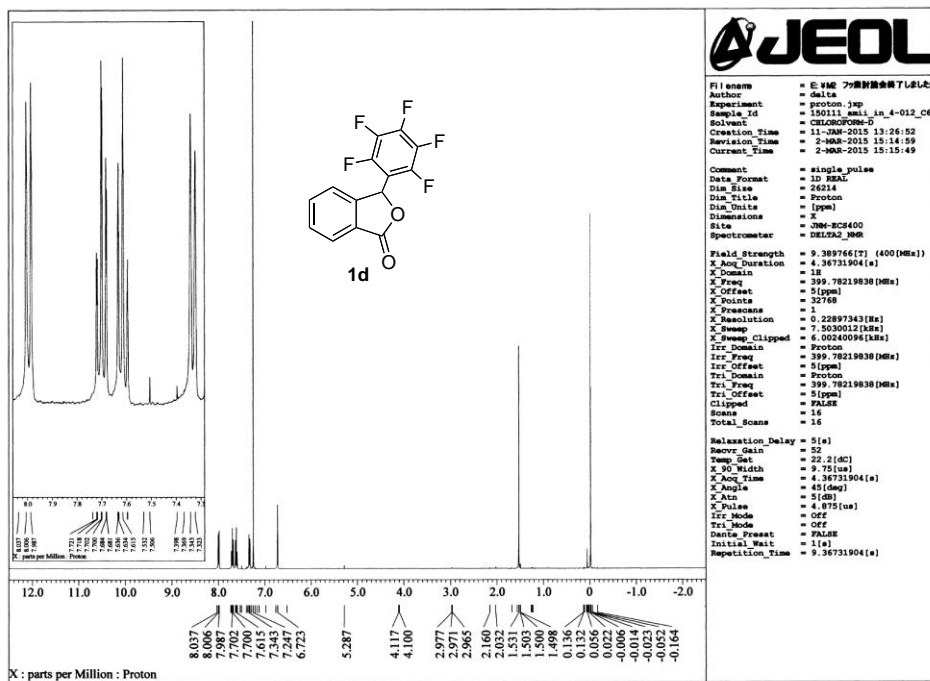

<sup>13</sup>C NMR Spectrum of 3-(pentafluorophenyl)phthalide (**1d**)

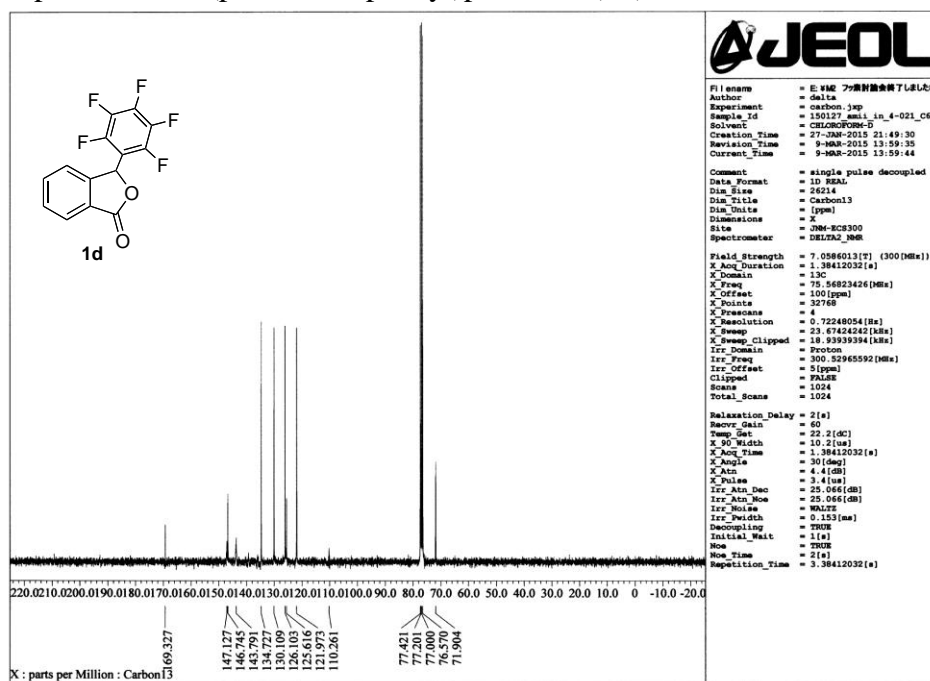

# <sup>19</sup>F NMR Spectrum of 3-(pentafluorophenyl)phthalide (1d)

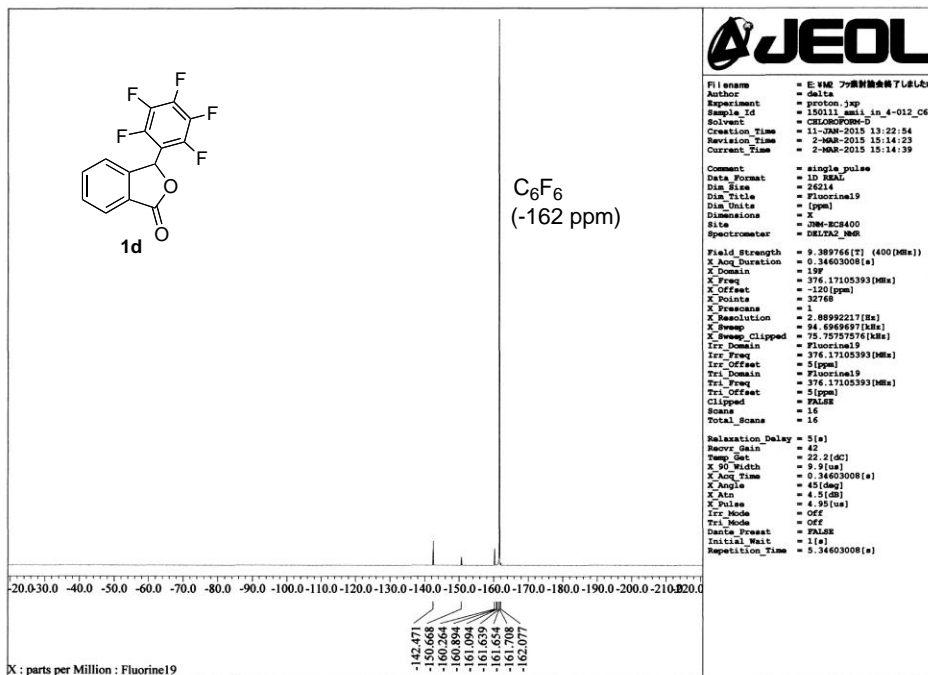

# HPLC Analytical Data of 3-(trifluoromethyl)phthalide (1a)

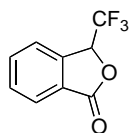

個別レポートDefault

| サンプル情報   |                        |              |                          |
|----------|------------------------|--------------|--------------------------|
| サンプル名:   | 150124_M1_223          | 分析担当書:       | System                   |
| サンプルの種類: | 未知試料                   | サンプル名:       | 150124_M1_221            |
| バリエーション: | 7                      | 取り込みメソッドセット: | 150124_M1_221            |
| 注入量:     | 10.00 μL               | 解析メソッド:      | 150124_M1_223            |
| 分析時間:    | 30.00 分                | チャンネル名:      | 2998                     |
|          |                        | 解析チャンネルの説明:  | PDA 219.7 nm (210-250)nm |
| 分析日:     | 2015/01/24 2:01:02 JST |              |                          |
| 解析日:     | 2015/01/24 2:50:06 JST |              |                          |

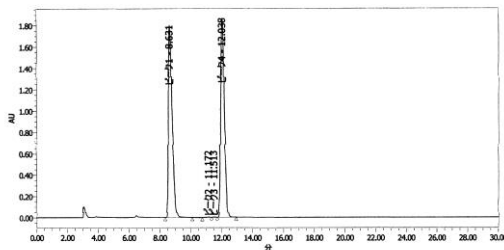

| 成分名    | 保持時間 (分) | 面積 (μV秒) | %面積   | 高さ (μV) |
|--------|----------|----------|-------|---------|
| 1 ピーク1 | 8.631    | 31013021 | 49.98 | 1798444 |
| 2 ピーク2 | 11.172   | 51819    | 0.08  | 3535    |
| 3 ピーク3 | 11.513   | 42631    | 0.07  | 2594    |
| 4 ピーク4 | 12.038   | 30942364 | 49.87 | 1863154 |

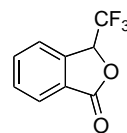

(27% ee) 個別レポートDefault

| サンプル情報   |                         |              |                          |
|----------|-------------------------|--------------|--------------------------|
| サンプル名:   | 150209_M1_230           | 分析担当書:       | System                   |
| サンプルの種類: | 未知試料                    | サンプル名:       | 150209_M1_230            |
| バリエーション: | 8                       | 取り込みメソッドセット: | 150209_M1_230            |
| 注入量:     | 10.00 μL                | 解析メソッド:      | 150209_M1_230            |
| 分析時間:    | 30.00 分                 | チャンネル名:      | 2998                     |
|          |                         | 解析チャンネルの説明:  | PDA 250.1 nm (210-250)nm |
| 分析日:     | 2015/02/09 12:16:32 JST |              |                          |
| 解析日:     | 2015/02/09 12:51:31 JST |              |                          |

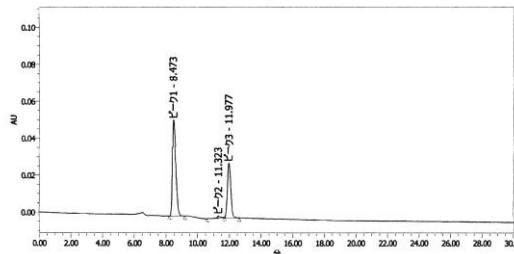

| 成分名    | 保持時間 (分) | 面積 (μV秒) | %面積   | 高さ (μV) |
|--------|----------|----------|-------|---------|
| 1 ピーク1 | 8.473    | 785284   | 62.18 | 52147   |
| 2 ピーク2 | 11.323   | 25760    | 2.04  | 1554    |
| 3 ピーク3 | 11.977   | 451785   | 35.78 | 29986   |
